# Supplementary material for: CODEX2: full-spectrum copy number variation detection by high-throughput DNA sequencing
Source: PubMed Central journal article supplement (PMC6260772; doi:10.1186/s13059-018-1578-y), 2018-11-26
Supplement: 13059_2018_1578_MOESM1_ESM.pdf [file 13059_2018_1578_MOESM1_ESM.pdf]

---

**Algorithm S1.** Parameter estimation algorithm for CODEX.

---

**Initialization:**

$$\beta^{old} = 1^n, g = 0^{n \times K}, h = 0^{m \times K}.$$

**Iteration:**

1. For each sample  $j$ , fit a smoothing spline  $Y_{:j}/N_j \beta^{old} \exp(g \times h_{j:}^T) \sim GC$  to get  $f_j(GC)$ .
  2. For each exon  $i$ , update  $\beta_i$  as  $\beta_i^{new} = \text{median}\left([Y/Nf(GC) \exp(g \times h^T)]_{i:}\right)$ .
  3. Denote  $Z = Nf(GC)\beta^{new}$ . Apply SVD to row-centered  $\log(Y/Z)$  to obtain the  $K$  right singular vectors and use as  $h^{old}$ .
    - (a) For each  $i$ , fit Poisson log-linear regression with  $Y_{i:}$  as response,  $h^{old}$  as covariates,  $\log(Z_{i:})$  as fixed offset to obtain updated estimates as  $\{g_{i1}, \dots, g_{iK}\}$ .
    - (b) For each  $j$ , fit Poisson log-linear regression with  $Y_{:j}$  as response,  $g$  as covariates,  $\log(Z_{:j})$  as fixed offset to obtain updated estimates as  $\{h_{j1}^{new}, \dots, h_{jK}^{new}\}$ .
    - (c) Center each row of  $g \times (h^{new})^T$  and apply SVD to the row-centered matrix to obtain the  $K$  right singular vectors to update  $h^{new}$ .
    - (d) Repeat steps (a) to (c) with  $h^{old} = h^{new}$  till convergence to obtain  $h, g$ .
  4. Repeat steps 1 to 3 with  $\beta^{old} = \beta^{new}$  till convergence.
-

---

**Algorithm S2.** Parameter estimation algorithm for CODEX2 with negative control samples.

---

Let  $J_c$  be the indices of the control samples.

1. Apply CODEX to the null samples  $Y_{:J_c}$  and  $GC$  using Supplementary Algorithm 1 to get an estimate of  $h_{J_c}, g, \beta$  and  $f_{J_c}(GC)$ .
  2. For case sample  $j \notin J_c$ , initiate  $h_{j1}^{old} = \dots = h_{jK}^{old} = 0$ .
    - (a) Fit a smoothing spline  $Y_{:j}/N_j\beta \exp(g \times h_{j:}^{oldT}) \sim GC$  to get  $f_j(GC)$ .
    - (b) Denote  $Z = Nf(GC)\beta$ . Fit Poisson log-linear regression with  $Y_{:j}$  as response,  $g$  as covariates,  $\log(Z_{:j})$  as fixed offset to obtain updated estimates as  $\{h_{j1}^{new}, \dots, h_{jK}^{new}\}$ .
    - (c) Repeat steps (a) to (b) with  $h_{j:}^{old} = h_{j:}^{new}$  till convergence to obtain  $h_{j:}, f_j(GC)$ .
-

---

**Algorithm S3.** Parameter estimation algorithm for CODEX2 without negative control samples.

---

Let  $I^*$  be the indices of exons with CNVs with high population frequencies.

1. Apply CODEX to the null regions  $Y_{-I^*}$  and  $GC_{-I^*}$  using Supplementary Algorithm 1 to get an estimate of  $h, g_{-I^*}, \beta_{-I^*}$  and  $f(GC_{-I^*})$ .
2. Use the estimated non-parametric smooth spline function to estimate the GC content bias in the non-null regions  $f(GC_{I^*})$  with the corresponding  $GC_{I^*}$ .
3. For each  $i^* \in I^*$ , adopt an EM algorithm to estimate  $\beta_{i^*}$  and  $\{g_{i^*1}, \dots, g_{i^*K}\}$ .

(a) E-step:

$$\begin{aligned} p_1 &= P(Y_{i^*j} | N_j, f_j(GC_{i^*}), Z_{i^*j} = 1, \hat{\mu}_{i^*}) \hat{\pi}_{i^*}, \\ p_0 &= P(Y_{i^*j} | N_j, f_j(GC_{i^*}), Z_{i^*j} = 0, \hat{\mu}_{i^*}) (1 - \hat{\pi}_{i^*}), \\ \hat{Z}_{i^*j} &= p_1 / (p_1 + p_0), \end{aligned}$$

where  $\hat{\mu}_{i^*}$  and  $\hat{\pi}_{i^*}$  are from the previous M-step and  $P(Y_{i^*j} | \lambda_{i^*j})$  is the probability for Poisson distribution with  $\lambda_{i^*j}$  calculated based on the given parameters.

(b) M-step:

$$\hat{\pi}_{i^*} = \frac{1}{m} \sum_{j=1}^m \hat{Z}_{i^*j},$$

where  $\hat{Z}_{i^*j}$  is from the previous E-step. Run Poisson log-linear regression with  $Y_{i^*}$  as response,  $h$  and  $\hat{Z}_{i^*}$  as covariates, and  $\log(N \times f(GC))_{i^*}$  as fixed offsets to obtain estimates of  $\hat{\beta}_{i^*}$  as intercept,  $\{\hat{g}_{i^*1}, \dots, \hat{g}_{i^*K}\}$  and  $\hat{\mu}_{i^*}$  as coefficients.

---

**Figure S1.** WGS CNV calls from Phase 3 release by two callers. WGS CNV calls from Phase 3 release by two callers. Number of deletion and duplication calls are reported in the cohort of 90 HapMap samples that we used to benchmark. There is substantial discrepancy between the results by the two callers. These CNV calls are contaminated by false positives.

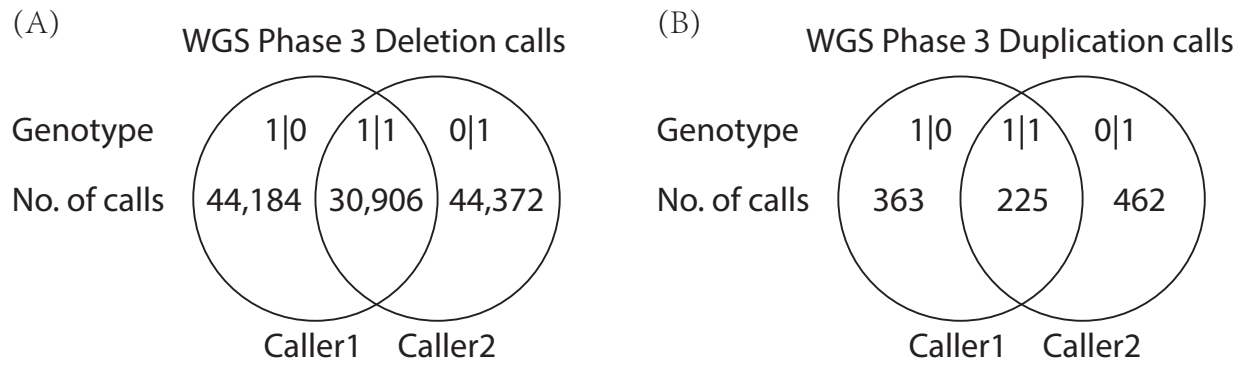

**Figure S2.** WGS CNV calls in trio dataset by CNVnator and CODEX2. WGS CNV calls in family trio dataset by (A) CNVnator and (B) CODEX2. CNVnator and CODEX2 return on average 1011 and 188 CNVs per individual, respectively. Results by CODEX2 show higher similarity between child and parents and lower similarity between non-related individuals.

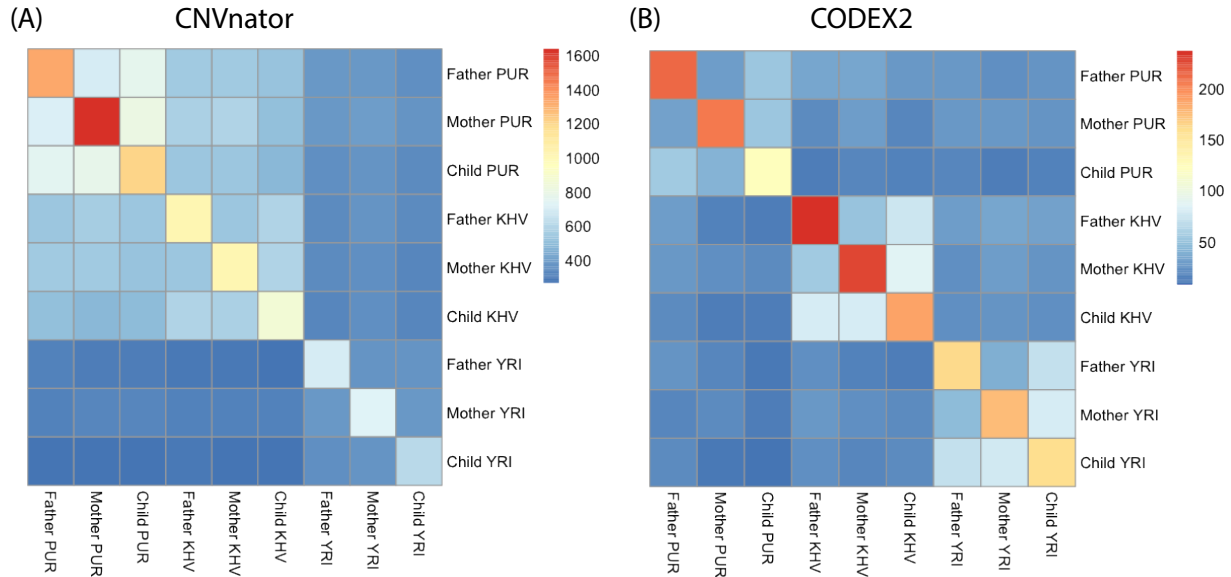

**Figure S3.** Performance assessment of WGS CNV calls. Performance assessment of WGS CNV calls by CNVnator and CODEX2. CNVs that are true positives are more likely to be shared between related individuals than between unrelated individuals. (A) Proportion of CNVs detected in mother that are also in father. Except for common CNVs that are shared between non-related individuals, this proportion should be low and is indicative of specificity. (B) Proportion of CNVs detected in child that are also in either parents. This Mendelian concordance should be high and is indicative of sensitivity. (C) Ratio of concordance between related individuals from (A) and unrelated individuals from (B) as a joint measurement of sensitivity and specificity.

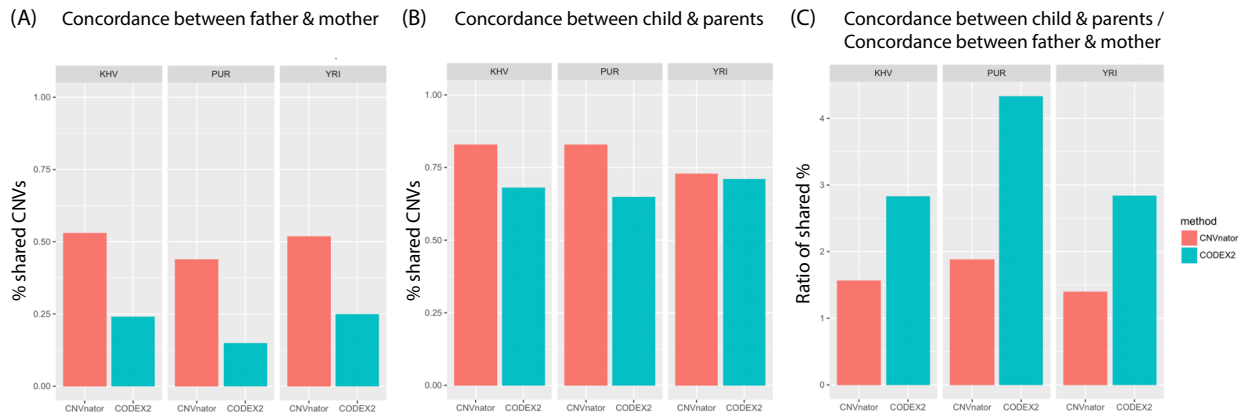

**Figure S4.** Model selection and parameter estimation in spike-in studies. Model selection and parameter estimation in spike-in studies. (A) Number of latent factors is determined by variance reduction and BIC based on the null read depth after quality control procedures and is kept the same throughout the spike-in studies. (B-D) True underlying parameters and estimated parameters by CODEX and CODEX2. CODEX biasedly estimates the exon-specific latent factor  $\{g_1, g_2, g_3\}$  for the exons, where common CNV signals are *in silico* added.

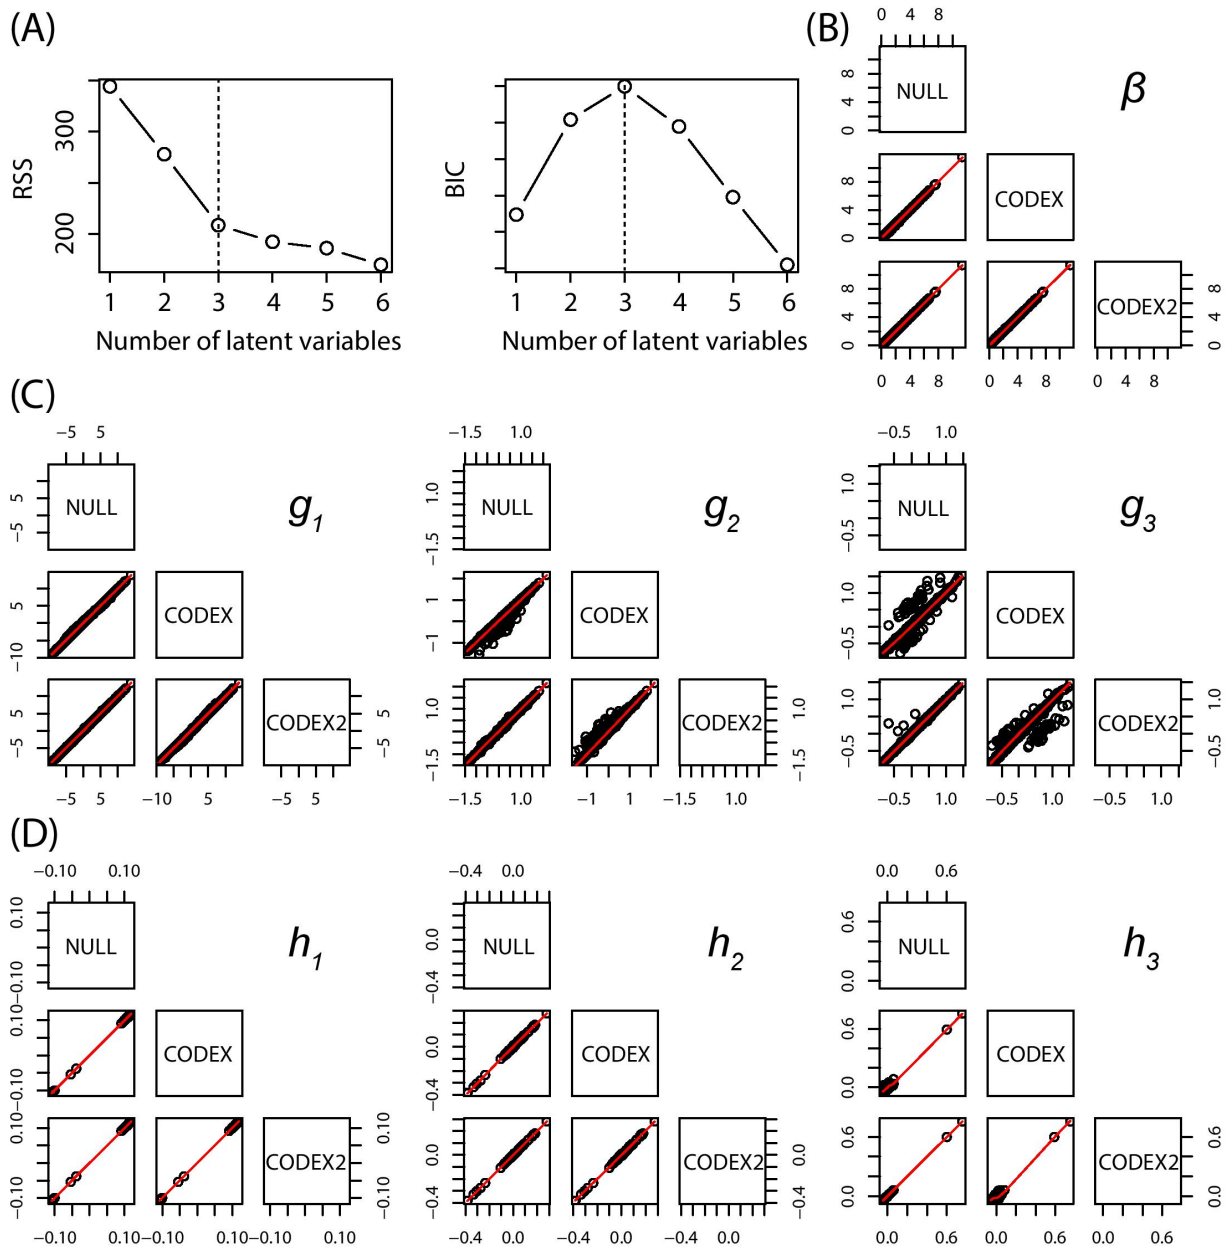

**Figure S5.** Biased parameter estimation by CODEX with common CNV signals. Parameter estimation by CODEX when the null data is mixed with alternatives with different frequencies. Here we focus on a specific exon  $i^*$  and try to estimate  $g_{i^*1}$  from Poisson generalized linear model taking  $h_1$  as known from previous iteration.

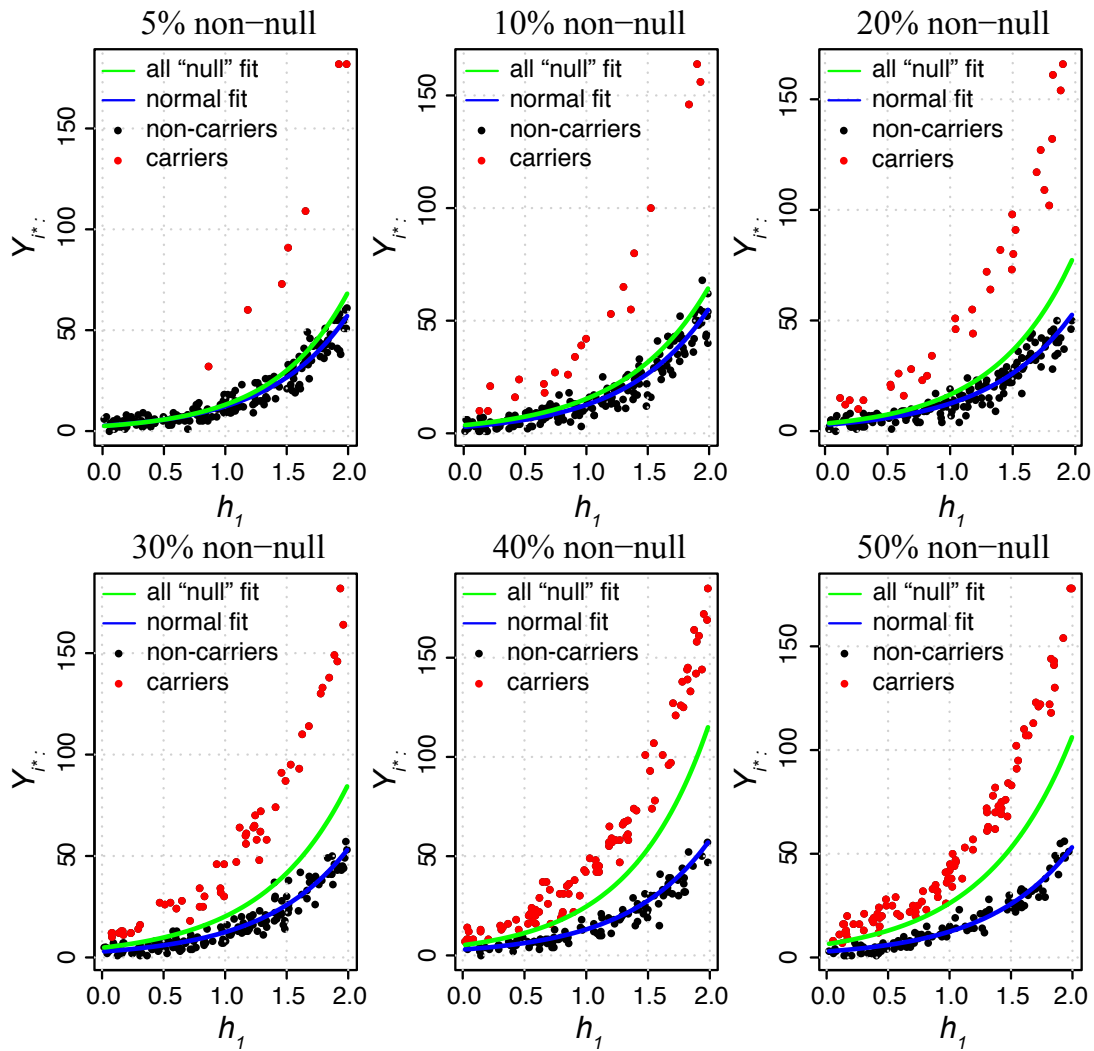

**Figure S6.** Assessment of precision and recall rates with different CNV lengths. Assessment of precision and recall rates with different CNV lengths. CODEX2 has nearly perfect performance compared to CODEX and SVD-based method, which suffer from low recall and precision rates for large and common CNV singals.

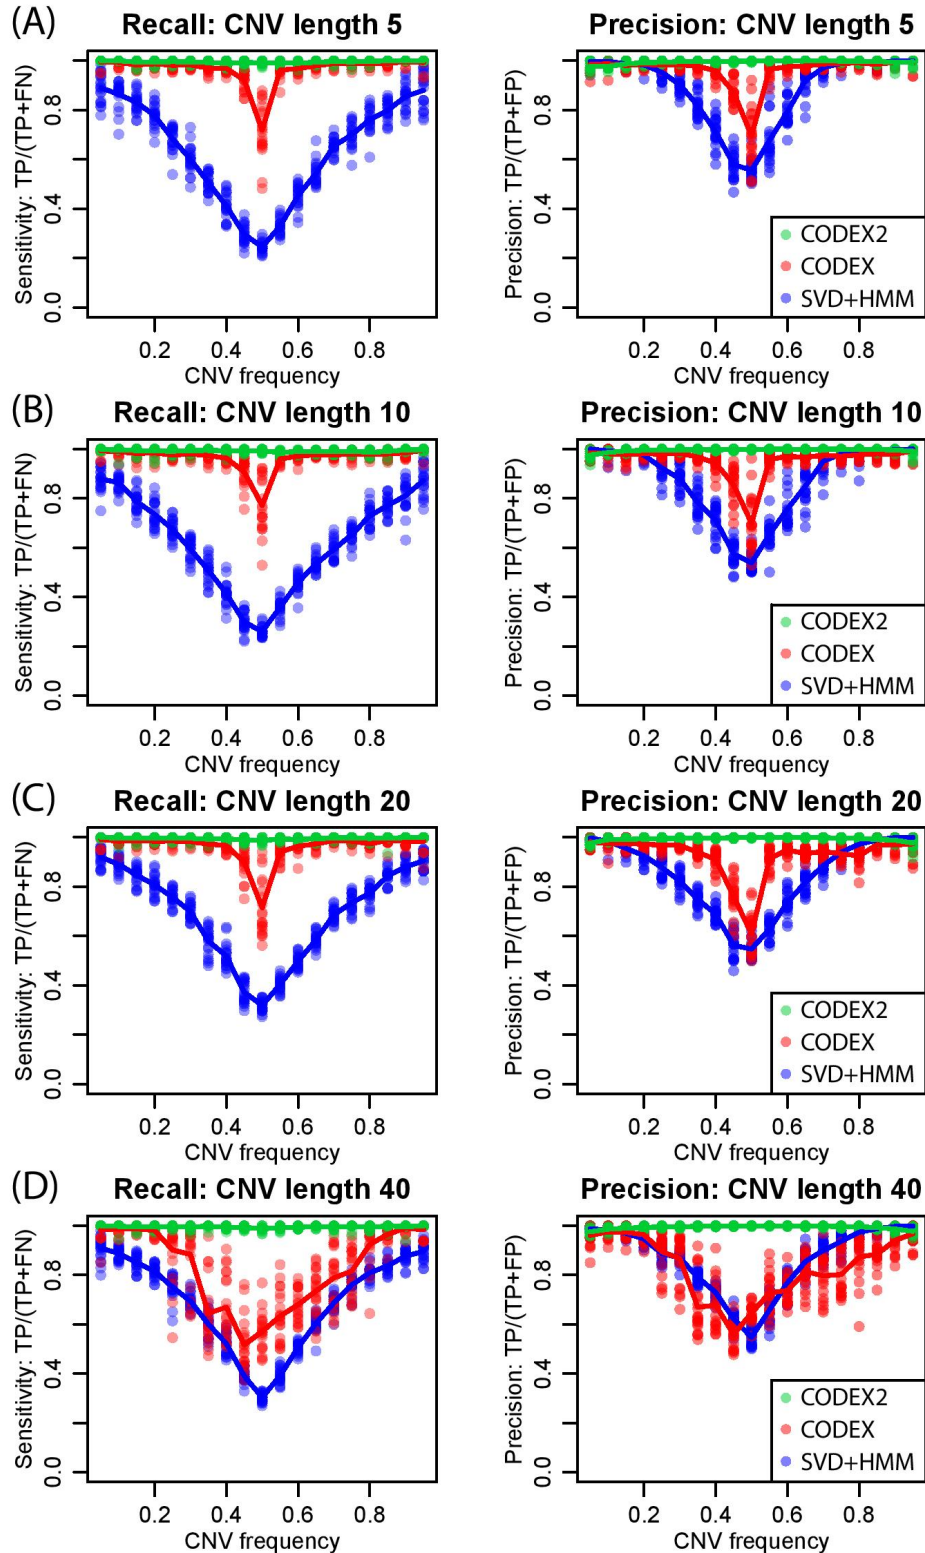



**Figure S7.** Relationship between CNV state and batch effect. Relationship between CNV state and batch effect. (A) The null read depth from the 1000 Genomes Project after quality control procedures show distinct batch effect between two centers, where the samples were sequenced. An example spike-in run where the CNVs are mostly added to the samples from one center. The CNV state and the batch effect are highly correlated. (B) An example of Poisson log-linear regression to estimate the exon-specific latent factor for a specific exon in a common CNV region. The vertical axis is  $Y$  (in this case the spike-in read depth) while the horizontal axis is the  $\lambda$  (estimated null read depth by CODEX and CODEX2). If there is no CNV, these two quantities should be approximately equal along the diagonal line. CODEX's fitted results separate the carriers and non-carriers at two sides of the diagonal line. CODEX2 adopts the EM algorithm with the non-carriers lying along the diagonal line as expected and the carriers below the diagonal line called as deletions. (C) Heatmap of the normalization results in all non-null exons across all samples. CODEX suffers from low sensitivity for detecting true deletions in carriers and false positives as deletions in non-carriers.

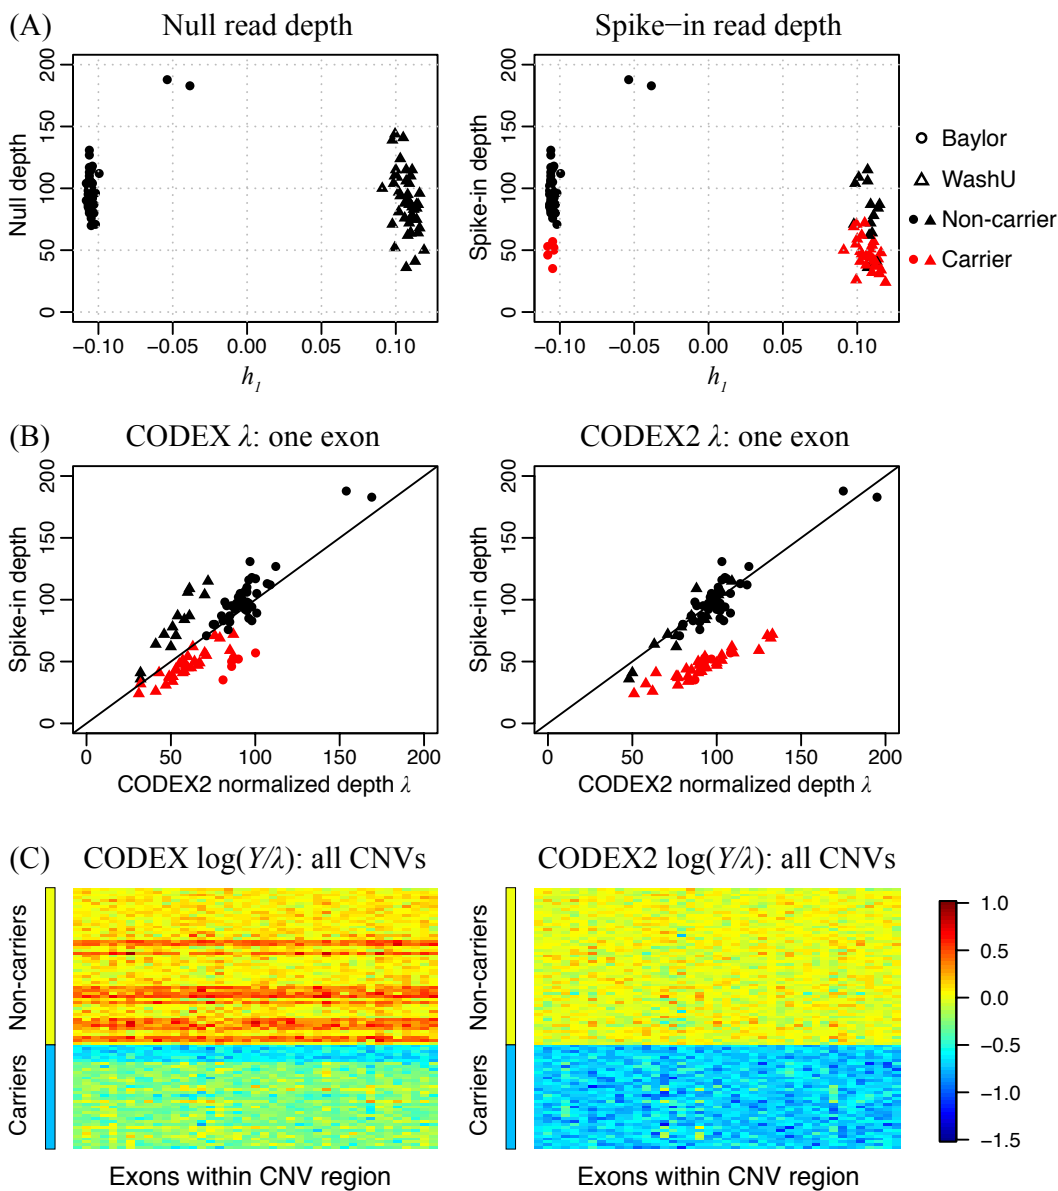

**Table S4.** Performance assessment and benchmark of WES CNV calls. Performance assessment and benchmark of WES CNV calls from the 1000 Genomes Project in the 90 HapMap samples by CODEX2, CODEX, CLAMMS,XHMM, and EXCAVATOR. F-measure is defined as harmonic mean of precision and recall.

| HapMap3   |     |      |    |     |    |             |           |           |     |        |    |     |    |        |             |           |           |      |    |    |    |        |             |           |
|-----------|-----|------|----|-----|----|-------------|-----------|-----------|-----|--------|----|-----|----|--------|-------------|-----------|-----------|------|----|----|----|--------|-------------|-----------|
|           | All |      |    |     |    |             |           |           |     | Common |    |     |    |        |             | Rare      |           |      |    |    |    |        |             |           |
|           | TP  | TN   | FP | FN  | Na | Sensitivity | Precision | F_measure |     | TP     | TN | FP  | FN | Na     | Sensitivity | Precision | F_measure | TP   | TN | FP | FN | Na     | Sensitivity | Precision |
| XHMM      | 56  | 2004 | 30 | 237 | 13 | 0.1911      | 0.6512    | 0.2955    | 24  | 839    | 2  | 203 | 12 | 0.1057 | 0.9231      | 0.1897    | 33        | 1246 | 28 | 42 | 1  | 0.44   | 0.541       | 0.4853    |
| EXCAVATOR | 47  | 1937 | 98 | 245 | 13 | 0.161       | 0.3241    | 0.2151    | 31  | 803    | 39 | 195 | 12 | 0.1372 | 0.4429      | 0.2095    | 16        | 1215 | 59 | 59 | 1  | 0.2133 | 0.2133      | 0.2133    |
| CLAMMS    | 175 | 2027 | 7  | 118 | 13 | 0.5973      | 0.9615    | 0.7368    | 141 | 835    | 6  | 86  | 12 | 0.6211 | 0.9592      | 0.754     | 34        | 1273 | 1  | 41 | 1  | 0.4533 | 0.9714      | 0.6182    |
| CODEX     | 132 | 1995 | 39 | 161 | 13 | 0.4505      | 0.7719    | 0.569     | 86  | 832    | 9  | 141 | 12 | 0.3789 | 0.9053      | 0.5342    | 46        | 1244 | 30 | 29 | 1  | 0.6133 | 0.6053      | 0.6093    |
| CODEX2    | 272 | 1948 | 86 | 21  | 13 | 0.9283      | 0.7598    | 0.8356    | 218 | 821    | 20 | 9   | 12 | 0.9604 | 0.916       | 0.9376    | 63        | 1205 | 69 | 12 | 1  | 0.84   | 0.4773      | 0.6087    |

  

| Conrad et al. |     |      |    |     |    |             |           |           |     |        |    |     |    |        |             |           |           |      |    |    |    |        |             |           |
|---------------|-----|------|----|-----|----|-------------|-----------|-----------|-----|--------|----|-----|----|--------|-------------|-----------|-----------|------|----|----|----|--------|-------------|-----------|
|               | All |      |    |     |    |             |           |           |     | Common |    |     |    |        |             | Rare      |           |      |    |    |    |        |             |           |
|               | TP  | TN   | FP | FN  | Na | Sensitivity | Precision | F_measure |     | TP     | TN | FP  | FN | Na     | Sensitivity | Precision | F_measure | TP   | TN | FP | FN | Na     | Sensitivity | Precision |
| XHMM          | 66  | 3401 | 14 | 481 | 88 | 0.1207      | 0.825     | 0.2105    | 41  | 1659   | 6  | 404 | 50 | 0.0921 | 0.8723      | 0.1667    | 27        | 1823 | 9  | 83 | 38 | 0.2455 | 0.75        | 0.3699    |
| EXCAVATOR     | 59  | 3396 | 19 | 488 | 88 | 0.1079      | 0.7564    | 0.1888    | 52  | 1639   | 26 | 393 | 50 | 0.1169 | 0.6667      | 0.1989    | 11        | 1828 | 4  | 99 | 38 | 0.1    | 0.7333      | 0.176     |
| CLAMMS        | 229 | 3403 | 13 | 317 | 88 | 0.4194      | 0.9463    | 0.5812    | 187 | 1654   | 11 | 258 | 50 | 0.4202 | 0.9444      | 0.5816    | 42        | 1828 | 4  | 68 | 38 | 0.3818 | 0.913       | 0.5385    |
| CODEX         | 167 | 3351 | 64 | 380 | 88 | 0.3053      | 0.7229    | 0.4293    | 136 | 1605   | 59 | 310 | 50 | 0.3049 | 0.6974      | 0.4243    | 33        | 1827 | 5  | 77 | 38 | 0.3    | 0.8684      | 0.4459    |
| CODEX2        | 332 | 3319 | 96 | 215 | 88 | 0.6069      | 0.7757    | 0.681     | 298 | 1591   | 74 | 147 | 50 | 0.6697 | 0.8011      | 0.7295    | 42        | 1808 | 24 | 68 | 38 | 0.3818 | 0.6364      | 0.4773    |

  

| McCarroll et al. |     |      |    |     |    |             |           |           |     |        |    |     |    |        |             |           |           |      |    |    |    |        |             |           |
|------------------|-----|------|----|-----|----|-------------|-----------|-----------|-----|--------|----|-----|----|--------|-------------|-----------|-----------|------|----|----|----|--------|-------------|-----------|
|                  | All |      |    |     |    |             |           |           |     | Common |    |     |    |        |             | Rare      |           |      |    |    |    |        |             |           |
|                  | TP  | TN   | FP | FN  | Na | Sensitivity | Precision | F_measure |     | TP     | TN | FP  | FN | Na     | Sensitivity | Precision | F_measure | TP   | TN | FP | FN | Na     | Sensitivity | Precision |
| XHMM             | 86  | 2367 | 21 | 371 | 35 | 0.1882      | 0.8037    | 0.305     | 49  | 1122   | 10 | 340 | 9  | 0.126  | 0.8305      | 0.2188    | 42        | 1325 | 12 | 35 | 26 | 0.5455 | 0.7778      | 0.6412    |
| EXCAVATOR        | 69  | 2330 | 60 | 386 | 35 | 0.1516      | 0.5349    | 0.2363    | 48  | 1093   | 41 | 339 | 9  | 0.124  | 0.5393      | 0.2017    | 24        | 1318 | 19 | 53 | 26 | 0.3117 | 0.5581      | 0.4       |
| CLAMMS           | 208 | 2380 | 8  | 249 | 35 | 0.4551      | 0.963     | 0.6181    | 157 | 1127   | 5  | 232 | 9  | 0.4036 | 0.9691      | 0.5699    | 51        | 1334 | 3  | 26 | 26 | 0.6623 | 0.9444      | 0.7786    |
| CODEX            | 164 | 2367 | 22 | 292 | 35 | 0.3596      | 0.8817    | 0.5109    | 116 | 1113   | 20 | 272 | 9  | 0.299  | 0.8529      | 0.4427    | 57        | 1334 | 3  | 20 | 26 | 0.7403 | 0.95        | 0.8321    |
| CODEX2           | 361 | 2364 | 25 | 95  | 35 | 0.7917      | 0.9352    | 0.8575    | 308 | 1113   | 20 | 80  | 9  | 0.7938 | 0.939       | 0.8603    | 62        | 1330 | 7  | 15 | 26 | 0.8052 | 0.8986      | 0.8493    |

  

| Phase 3 WGS |     |      |     |     |    |             |           |           |     |        |    |     |    |        |             |           |           |      |    |    |    |        |             |           |
|-------------|-----|------|-----|-----|----|-------------|-----------|-----------|-----|--------|----|-----|----|--------|-------------|-----------|-----------|------|----|----|----|--------|-------------|-----------|
|             | All |      |     |     |    |             |           |           |     | Common |    |     |    |        |             | Rare      |           |      |    |    |    |        |             |           |
|             | TP  | TN   | FP  | FN  | Na | Sensitivity | Precision | F_measure |     | TP     | TN | FP  | FN | Na     | Sensitivity | Precision | F_measure | TP   | TN | FP | FN | Na     | Sensitivity | Precision |
| XHMM        | 47  | 2451 | 23  | 359 | 0  | 0.1158      | 0.6714    | 0.1975    | 20  | 937    | 0  | 303 | 0  | 0.0619 | 1           | 0.1166    | 28        | 1676 | 23 | 73 | 0  | 0.2772 | 0.549       | 0.3684    |
| EXCAVATOR   | 34  | 2390 | 84  | 372 | 0  | 0.0837      | 0.2881    | 0.1298    | 21  | 910    | 28 | 301 | 0  | 0.0652 | 0.4286      | 0.1132    | 13        | 1641 | 58 | 88 | 0  | 0.1287 | 0.1831      | 0.1512    |
| CLAMMS      | 238 | 2472 | 2   | 168 | 0  | 0.5862      | 0.9917    | 0.7368    | 210 | 935    | 2  | 113 | 0  | 0.6502 | 0.9906      | 0.785     | 28        | 1699 | 0  | 73 | 0  | 0.2772 | 1           | 0.4341    |
| CODEX       | 169 | 2377 | 104 | 230 | 0  | 0.4236      | 0.619     | 0.503     | 129 | 889    | 54 | 188 | 0  | 0.4069 | 0.7049      | 0.516     | 40        | 1650 | 50 | 60 | 0  | 0.4    | 0.4444      | 0.4211    |
| CODEX2      | 269 | 2307 | 168 | 136 | 0  | 0.6642      | 0.6156    | 0.639     | 228 | 864    | 73 | 95  | 0  | 0.7059 | 0.7575      | 0.7308    | 52        | 1602 | 98 | 48 | 0  | 0.52   | 0.3467      | 0.416     |

**Table S5.** WGS family trio dataset from the 1000 Genomes Project. WGS family trio dataset from the 1000 Genomes Project. Mendelian concordance is used as metric to assess CNV calling quality.

| Family_ID | Individual_ID | Relationship | Population | Bam_file                                                  |
|-----------|---------------|--------------|------------|-----------------------------------------------------------|
| PR05      | HG00731       | father       | PUR        | HG00731.mapped.ILLUMINA.bwa.PUR.low_coverage.20130422.bam |
| PR05      | HG00732       | mother       | PUR        | HG00732.mapped.ILLUMINA.bwa.PUR.low_coverage.20130422.bam |
| PR05      | HG00733       | child        | PUR        | HG00733.mapped.ILLUMINA.bwa.PUR.low_coverage.20130415.bam |
| VN049     | HG02026       | father       | KHV        | HG02026.mapped.ILLUMINA.bwa.KHV.low_coverage.20130415.bam |
| VN049     | HG02025       | mother       | KHV        | HG02025.mapped.ILLUMINA.bwa.KHV.low_coverage.20130415.bam |
| VN049     | HG02024       | child        | KHV        | HG02024.mapped.ILLUMINA.bwa.KHV.low_coverage.20130415.bam |
| Y117      | NA19239       | father       | YRI        | NA19239.mapped.ILLUMINA.bwa.YRI.low_coverage.20130415.bam |
| Y117      | NA19238       | mother       | YRI        | NA19238.mapped.ILLUMINA.bwa.YRI.low_coverage.20130415.bam |
| Y117      | NA19240       | child        | YRI        | NA19240.mapped.ILLUMINA.bwa.YRI.low_coverage.20130415.bam |

**Table S7.** Performance of CODEX and CODEX2 with different number of latent factors. Performance of CODEX and CODEX2 with different number of latent factors. CODEX and CODEX2 are applied to the melanoma targeted sequencing data set with the number of latent factors  $K$  ranging from 0 to 10. Correlations of the profiled losses and gains ( $r_{loss}$  and  $r_{gain}$  respectively) by CODEX and CODEX2 with those reported by TCGA, as well as the number of *BRAF* gains and *PTEN* losses out of 334 tumor samples are used as measurements. CNV profiles by CODEX2 are consistent since only the negative control samples (16 normal samples) are used to estimate the target-specific bias and artifacts. For CODEX, true CNV signals are attenuated with a large  $K$  resulting in less CNV events and lower correlations.

| $K$ | CODEX2     |            |                   |                    | CODEX      |            |                   |                    |
|-----|------------|------------|-------------------|--------------------|------------|------------|-------------------|--------------------|
|     | $r_{loss}$ | $r_{gain}$ | <i>BRAF</i> gains | <i>PTEN</i> losses | $r_{loss}$ | $r_{gain}$ | <i>BRAF</i> gains | <i>PTEN</i> losses |
| 0   | 0.787      | 0.859      | 288               | 256                | 0.571      | 0.112      | 170               | 146                |
| 1   | 0.840      | 0.841      | 297               | 230                | 0.589      | -0.039     | 163               | 138                |
| 2   | 0.837      | 0.839      | 296               | 228                | 0.580      | -0.003     | 161               | 133                |
| 3   | 0.841      | 0.830      | 296               | 227                | 0.567      | 0.013      | 160               | 117                |
| 4   | 0.837      | 0.839      | 292               | 229                | 0.581      | 0.034      | 158               | 113                |
| 5   | 0.842      | 0.848      | 302               | 229                | 0.556      | 0.046      | 158               | 110                |
| 6   | 0.845      | 0.845      | 301               | 229                | 0.546      | 0.033      | 155               | 108                |
| 7   | 0.842      | 0.853      | 298               | 231                | 0.520      | 0.049      | 142               | 107                |
| 8   | 0.838      | 0.859      | 295               | 237                | 0.453      | 0.027      | 130               | 97                 |
| 9   | 0.831      | 0.858      | 299               | 234                | 0.435      | 0.042      | 128               | 95                 |
| 10  | 0.835      | 0.859      | 297               | 237                | 0.442      | 0.039      | 125               | 98                 |

**Table S8.** Recall and precision rates from simulations with deletions of different lengths. Recall rates (A) and precision rates (B) from simulations with deletions of different lengths (number of exons). Confidence interval (CI) is computed using the 5th and 95th percentile from 20 simulation runs.

(A)

| CNVfreq | CNVlength | CODEX.CBS |      |               | CODEX2ns.CBS |      |           | CODEX2nr.CBS |      |               | SVD.HMM |      |               |
|---------|-----------|-----------|------|---------------|--------------|------|-----------|--------------|------|---------------|---------|------|---------------|
|         |           | median    | sd   | CI            | median       | sd   | CI        | median       | sd   | CI            | median  | sd   | CI            |
| 0.10    | 5         | 1.00      | 0.00 | (0.999,1)     | 1.00         | 0.00 | (0.999,1) | 1.00         | 0.00 | (0.999,1)     | 1.00    | 0.04 | (0.926,1)     |
| 0.10    | 10        | 1.00      | 0.01 | (0.989,1)     | 1.00         | 0.00 | (0.989,1) | 1.00         | 0.01 | (0.989,1)     | 0.92    | 0.05 | (0.793,0.955) |
| 0.10    | 20        | 1.00      | 0.00 | (0.994,1)     | 1.00         | 0.00 | (1,1)     | 1.00         | 0.00 | (1,1)         | 0.95    | 0.04 | (0.893,1)     |
| 0.10    | 40        | 1.00      | 0.00 | (1,1)         | 1.00         | 0.00 | (1,1)     | 1.00         | 0.00 | (1,1)         | 0.99    | 0.03 | (0.922,1)     |
| 0.20    | 5         | 1.00      | 0.05 | (0.973,1)     | 1.00         | 0.00 | (0.992,1) | 1.00         | 0.00 | (0.992,1)     | 0.92    | 0.08 | (0.758,0.983) |
| 0.20    | 10        | 1.00      | 0.00 | (0.989,1)     | 1.00         | 0.00 | (0.995,1) | 1.00         | 0.00 | (0.995,1)     | 0.86    | 0.05 | (0.773,0.9)   |
| 0.20    | 20        | 1.00      | 0.00 | (0.997,1)     | 1.00         | 0.00 | (1,1)     | 1.00         | 0.00 | (1,1)         | 0.93    | 0.03 | (0.87,0.961)  |
| 0.20    | 40        | 1.00      | 0.04 | (0.988,1)     | 1.00         | 0.00 | (0.999,1) | 1.00         | 0.00 | (1,1)         | 0.98    | 0.05 | (0.903,0.997) |
| 0.30    | 5         | 1.00      | 0.01 | (0.977,1)     | 1.00         | 0.00 | (0.995,1) | 1.00         | 0.00 | (0.995,1)     | 0.82    | 0.06 | (0.725,0.907) |
| 0.30    | 10        | 0.99      | 0.01 | (0.976,0.997) | 1.00         | 0.00 | (0.993,1) | 1.00         | 0.00 | (0.986,1)     | 0.73    | 0.06 | (0.647,0.798) |
| 0.30    | 20        | 1.00      | 0.00 | (0.998,1)     | 1.00         | 0.00 | (1,1)     | 1.00         | 0.00 | (1,1)         | 0.88    | 0.03 | (0.84,0.936)  |
| 0.30    | 40        | 1.00      | 0.04 | (0.984,1)     | 1.00         | 0.00 | (0.999,1) | 1.00         | 0.00 | (0.999,1)     | 0.93    | 0.06 | (0.812,0.977) |
| 0.40    | 5         | 0.99      | 0.02 | (0.946,1)     | 1.00         | 0.00 | (1,1)     | 1.00         | 0.00 | (1,1)         | 0.61    | 0.07 | (0.501,0.663) |
| 0.40    | 10        | 0.96      | 0.02 | (0.938,0.984) | 1.00         | 0.00 | (0.995,1) | 1.00         | 0.00 | (0.995,1)     | 0.54    | 0.06 | (0.46,0.618)  |
| 0.40    | 20        | 1.00      | 0.01 | (0.966,1)     | 1.00         | 0.00 | (0.999,1) | 1.00         | 0.00 | (0.999,1)     | 0.78    | 0.03 | (0.717,0.796) |
| 0.40    | 40        | 0.94      | 0.46 | (0,0.999)     | 1.00         | 0.00 | (0.999,1) | 1.00         | 0.00 | (0.998,1)     | 0.81    | 0.41 | (0,0.882)     |
| 0.50    | 5         | 0.79      | 0.07 | (0.648,0.887) | 1.00         | 0.00 | (0.997,1) | 1.00         | 0.08 | (0.846,1)     | 0.30    | 0.05 | (0.231,0.38)  |
| 0.50    | 10        | 0.85      | 0.06 | (0.71,0.91)   | 1.00         | 0.00 | (0.996,1) | 1.00         | 0.08 | (0.813,1)     | 0.28    | 0.04 | (0.236,0.343) |
| 0.50    | 20        | 0.90      | 0.06 | (0.842,0.983) | 1.00         | 0.00 | (0.998,1) | 1.00         | 0.00 | (1,1)         | 0.64    | 0.04 | (0.578,0.686) |
| 0.50    | 40        | 0.90      | 0.28 | (0.036,0.989) | 1.00         | 0.00 | (0.999,1) | 1.00         | 0.04 | (0.906,1)     | 0.74    | 0.23 | (0.009,0.781) |
| 0.60    | 5         | 1.00      | 0.00 | (0.991,1)     | 1.00         | 0.00 | (0.997,1) | 1.00         | 0.00 | (1,1)         | 0.57    | 0.07 | (0.468,0.676) |
| 0.60    | 10        | 0.98      | 0.04 | (0.878,0.99)  | 1.00         | 0.00 | (0.991,1) | 0.99         | 0.01 | (0.959,0.995) | 0.54    | 0.05 | (0.496,0.611) |
| 0.60    | 20        | 1.00      | 0.02 | (0.951,1)     | 1.00         | 0.00 | (0.999,1) | 1.00         | 0.01 | (0.981,1)     | 0.73    | 0.04 | (0.691,0.814) |
| 0.60    | 40        | 0.00      | 0.19 | (0,0.09)      | 1.00         | 0.00 | (0.999,1) | 1.00         | 0.00 | (0.999,1)     | 0.00    | 0.14 | (0,0.069)     |
| 0.70    | 5         | 1.00      | 0.01 | (0.988,1)     | 1.00         | 0.00 | (0.995,1) | 1.00         | 0.00 | (0.995,1)     | 0.81    | 0.05 | (0.745,0.879) |
| 0.70    | 10        | 0.99      | 0.01 | (0.973,0.993) | 1.00         | 0.00 | (0.993,1) | 0.99         | 0.01 | (0.98,0.997)  | 0.74    | 0.04 | (0.656,0.781) |
| 0.70    | 20        | 1.00      | 0.00 | (0.993,1)     | 1.00         | 0.00 | (0.999,1) | 1.00         | 0.00 | (0.998,1)     | 0.87    | 0.03 | (0.817,0.914) |
| 0.70    | 40        | 0.04      | 0.48 | (0,0.999)     | 1.00         | 0.00 | (0.999,1) | 1.00         | 0.00 | (0.999,1)     | 0.03    | 0.45 | (0,0.959)     |
| 0.80    | 5         | 1.00      | 0.00 | (0.992,1)     | 1.00         | 0.00 | (0.994,1) | 1.00         | 0.00 | (1,1)         | 0.91    | 0.06 | (0.776,0.976) |
| 0.80    | 10        | 0.99      | 0.01 | (0.985,1)     | 1.00         | 0.00 | (0.992,1) | 0.99         | 0.01 | (0.98,1)      | 0.80    | 0.05 | (0.737,0.894) |
| 0.80    | 20        | 1.00      | 0.01 | (0.992,1)     | 1.00         | 0.00 | (0.999,1) | 1.00         | 0.00 | (0.997,1)     | 0.92    | 0.04 | (0.831,0.963) |
| 0.80    | 40        | 1.00      | 0.01 | (0.994,1)     | 1.00         | 0.00 | (0.999,1) | 1.00         | 0.00 | (0.999,1)     | 0.97    | 0.03 | (0.919,0.996) |
| 0.90    | 5         | 1.00      | 0.00 | (1,1)         | 1.00         | 0.00 | (0.993,1) | 1.00         | 0.00 | (0.999,1)     | 0.97    | 0.04 | (0.887,1)     |
| 0.90    | 10        | 1.00      | 0.01 | (0.98,1)      | 1.00         | 0.00 | (0.991,1) | 1.00         | 0.01 | (0.988,1)     | 0.89    | 0.04 | (0.814,0.921) |
| 0.90    | 20        | 1.00      | 0.00 | (0.995,1)     | 1.00         | 0.00 | (0.999,1) | 1.00         | 0.00 | (0.995,1)     | 0.99    | 0.03 | (0.935,1)     |
| 0.90    | 40        | 1.00      | 0.00 | (1,1)         | 1.00         | 0.00 | (0.998,1) | 1.00         | 0.00 | (1,1)         | 0.99    | 0.01 | (0.969,1)     |

(B)

| CNVfreq | CNVlength | CODEX.CBS |      |               | CODEX2ns.CBS |      |       | CODEX2nr.CBS |      |           | SVD.HMM |      |               |
|---------|-----------|-----------|------|---------------|--------------|------|-------|--------------|------|-----------|---------|------|---------------|
|         |           | median    | sd   | CI            | median       | sd   | CI    | median       | sd   | CI        | median  | sd   | CI            |
| 0.10    | 5         | 1.00      | 0.00 | (1,1)         | 1.00         | 0.00 | (1,1) | 1.00         | 0.00 | (1,1)     | 1.00    | 0.00 | (1,1)         |
| 0.10    | 10        | 1.00      | 0.00 | (1,1)         | 1.00         | 0.00 | (1,1) | 1.00         | 0.00 | (1,1)     | 1.00    | 0.00 | (1,1)         |
| 0.10    | 20        | 1.00      | 0.00 | (1,1)         | 1.00         | 0.00 | (1,1) | 1.00         | 0.00 | (1,1)     | 1.00    | 0.00 | (1,1)         |
| 0.10    | 40        | 1.00      | 0.00 | (1,1)         | 1.00         | 0.00 | (1,1) | 1.00         | 0.00 | (1,1)     | 1.00    | 0.01 | (0.998,1)     |
| 0.20    | 5         | 1.00      | 0.02 | (0.997,1)     | 1.00         | 0.00 | (1,1) | 1.00         | 0.00 | (1,1)     | 1.00    | 0.01 | (0.997,1)     |
| 0.20    | 10        | 1.00      | 0.01 | (0.997,1)     | 1.00         | 0.00 | (1,1) | 1.00         | 0.00 | (1,1)     | 1.00    | 0.02 | (0.997,1)     |
| 0.20    | 20        | 1.00      | 0.00 | (1,1)         | 1.00         | 0.00 | (1,1) | 1.00         | 0.00 | (1,1)     | 1.00    | 0.00 | (1,1)         |
| 0.20    | 40        | 1.00      | 0.03 | (0.96,1)      | 1.00         | 0.00 | (1,1) | 1.00         | 0.00 | (1,1)     | 1.00    | 0.02 | (0.996,1)     |
| 0.30    | 5         | 1.00      | 0.01 | (0.998,1)     | 1.00         | 0.00 | (1,1) | 1.00         | 0.00 | (1,1)     | 1.00    | 0.01 | (0.997,1)     |
| 0.30    | 10        | 1.00      | 0.01 | (0.998,1)     | 1.00         | 0.00 | (1,1) | 1.00         | 0.00 | (1,1)     | 1.00    | 0.01 | (0.964,1)     |
| 0.30    | 20        | 1.00      | 0.00 | (1,1)         | 1.00         | 0.00 | (1,1) | 1.00         | 0.00 | (1,1)     | 1.00    | 0.00 | (1,1)         |
| 0.30    | 40        | 1.00      | 0.02 | (0.941,1)     | 1.00         | 0.00 | (1,1) | 1.00         | 0.00 | (1,1)     | 1.00    | 0.02 | (0.956,1)     |
| 0.40    | 5         | 1.00      | 0.02 | (0.946,1)     | 1.00         | 0.00 | (1,1) | 1.00         | 0.00 | (1,1)     | 0.99    | 0.04 | (0.898,1)     |
| 0.40    | 10        | 1.00      | 0.01 | (0.97,1)      | 1.00         | 0.00 | (1,1) | 1.00         | 0.00 | (1,1)     | 0.98    | 0.02 | (0.935,1)     |
| 0.40    | 20        | 0.98      | 0.02 | (0.927,1)     | 1.00         | 0.00 | (1,1) | 1.00         | 0.00 | (1,1)     | 1.00    | 0.03 | (0.926,1)     |
| 0.40    | 40        | 0.92      | 0.23 | (0.332,0.993) | 1.00         | 0.00 | (1,1) | 1.00         | 0.00 | (1,1)     | 0.95    | 0.31 | (0.15,1)      |
| 0.50    | 5         | 0.62      | 0.06 | (0.531,0.713) | 1.00         | 0.00 | (1,1) | 1.00         | 0.09 | (0.787,1) | 0.56    | 0.07 | (0.513,0.73)  |
| 0.50    | 10        | 0.63      | 0.04 | (0.57,0.679)  | 1.00         | 0.00 | (1,1) | 1.00         | 0.08 | (0.901,1) | 0.57    | 0.05 | (0.502,0.645) |
| 0.50    | 20        | 0.55      | 0.03 | (0.534,0.588) | 1.00         | 0.00 | (1,1) | 1.00         | 0.00 | (0.996,1) | 0.51    | 0.02 | (0.503,0.556) |
| 0.50    | 40        | 0.55      | 0.09 | (0.44,0.666)  | 1.00         | 0.00 | (1,1) | 1.00         | 0.09 | (0.805,1) | 0.54    | 0.09 | (0.485,0.602) |
| 0.60    | 5         | 1.00      | 0.00 | (1,1)         | 1.00         | 0.00 | (1,1) | 1.00         | 0.00 | (1,1)     | 1.00    | 0.03 | (0.945,1)     |
| 0.60    | 10        | 1.00      | 0.02 | (0.96,1)      | 1.00         | 0.00 | (1,1) | 1.00         | 0.01 | (0.989,1) | 0.94    | 0.05 | (0.842,1)     |
| 0.60    | 20        | 0.97      | 0.05 | (0.882,0.995) | 1.00         | 0.00 | (1,1) | 1.00         | 0.01 | (0.988,1) | 0.91    | 0.06 | (0.799,0.979) |
| 0.60    | 40        | 0.08      | 0.24 | (0,0.551)     | 1.00         | 0.00 | (1,1) | 1.00         | 0.00 | (0.999,1) | 1.00    | 0.18 | (0.572,1)     |
| 0.70    | 5         | 1.00      | 0.01 | (0.998,1)     | 1.00         | 0.00 | (1,1) | 1.00         | 0.00 | (1,1)     | 1.00    | 0.02 | (0.958,1)     |
| 0.70    | 10        | 1.00      | 0.00 | (0.999,1)     | 1.00         | 0.00 | (1,1) | 1.00         | 0.00 | (1,1)     | 1.00    | 0.01 | (0.974,1)     |
| 0.70    | 20        | 0.99      | 0.02 | (0.971,1)     | 1.00         | 0.00 | (1,1) | 1.00         | 0.00 | (0.996,1) | 0.98    | 0.04 | (0.905,1)     |
| 0.70    | 40        | 0.49      | 0.39 | (0,0.995)     | 1.00         | 0.00 | (1,1) | 1.00         | 0.01 | (0.994,1) | 0.98    | 0.16 | (0.732,1)     |
| 0.80    | 5         | 1.00      | 0.00 | (1,1)         | 1.00         | 0.00 | (1,1) | 1.00         | 0.00 | (1,1)     | 1.00    | 0.01 | (0.997,1)     |
| 0.80    | 10        | 1.00      | 0.01 | (0.998,1)     | 1.00         | 0.00 | (1,1) | 1.00         | 0.00 | (1,1)     | 1.00    | 0.00 | (1,1)         |
| 0.80    | 20        | 1.00      | 0.04 | (0.902,1)     | 1.00         | 0.00 | (1,1) | 1.00         | 0.00 | (0.992,1) | 0.99    | 0.03 | (0.924,1)     |
| 0.80    | 40        | 0.99      | 0.09 | (0.767,1)     | 1.00         | 0.00 | (1,1) | 1.00         | 0.00 | (1,1)     | 1.00    | 0.02 | (0.963,1)     |
| 0.90    | 5         | 1.00      | 0.00 | (1,1)         | 1.00         | 0.00 | (1,1) | 1.00         | 0.00 | (1,1)     | 1.00    | 0.00 | (1,1)         |
| 0.90    | 10        | 1.00      | 0.00 | (1,1)         | 1.00         | 0.00 | (1,1) | 1.00         | 0.00 | (1,1)     | 1.00    | 0.00 | (1,1)         |
| 0.90    | 20        | 1.00      | 0.02 | (0.976,1)     | 1.00         | 0.00 | (1,1) | 1.00         | 0.00 | (0.99,1)  | 0.99    | 0.01 | (0.978,1)     |
| 0.90    | 40        | 1.00      | 0.06 | (0.89,1)      | 1.00         | 0.00 | (1,1) | 1.00         | 0.00 | (0.995,1) | 1.00    | 0.01 | (0.985,1)     |

**Table S9.** Recall and precision rates from simulations with copy number gains. Recall rates (A) and precision rates (B) from simulations with copy number gains. Confidence interval (CI) is computed using the 5th and 95th percentile from 20 simulation runs.

(A)

| CNVfreq | CNVlength | CODEX.CBS |      |               | CODEX2ns.CBS |      |               | CODEX2nr.CBS |      |               | SVD.HMM |      |               |
|---------|-----------|-----------|------|---------------|--------------|------|---------------|--------------|------|---------------|---------|------|---------------|
|         |           | median    | sd   | CI            | median       | sd   | CI            | median       | sd   | CI            | median  | sd   | CI            |
| 0.10    | 20        | 0.99      | 0.01 | (0.986,1)     | 0.99         | 0.00 | (0.988,1)     | 0.99         | 0.00 | (0.988,1)     | 0.94    | 0.05 | (0.827,0.988) |
| 0.20    | 20        | 0.99      | 0.03 | (0.962,0.997) | 1.00         | 0.00 | (0.989,1)     | 0.99         | 0.00 | (0.989,1)     | 0.87    | 0.03 | (0.834,0.937) |
| 0.30    | 20        | 0.97      | 0.02 | (0.92,0.987)  | 1.00         | 0.00 | (0.993,0.998) | 1.00         | 0.01 | (0.976,0.998) | 0.80    | 0.05 | (0.723,0.873) |
| 0.40    | 20        | 0.92      | 0.04 | (0.853,0.956) | 1.00         | 0.00 | (0.993,0.999) | 1.00         | 0.01 | (0.985,0.997) | 0.72    | 0.05 | (0.641,0.787) |
| 0.50    | 20        | 0.44      | 0.07 | (0.31,0.52)   | 1.00         | 0.00 | (0.984,0.998) | 0.90         | 0.09 | (0.735,0.989) | 0.24    | 0.10 | (0.137,0.405) |
| 0.60    | 20        | 0.17      | 0.04 | (0.124,0.227) | 1.00         | 0.00 | (0.988,0.997) | 0.76         | 0.08 | (0.626,0.877) | 0.63    | 0.08 | (0.458,0.685) |
| 0.70    | 20        | 0.50      | 0.07 | (0.398,0.586) | 1.00         | 0.00 | (0.988,0.997) | 0.91         | 0.08 | (0.789,0.959) | 0.85    | 0.03 | (0.811,0.892) |
| 0.80    | 20        | 0.72      | 0.08 | (0.615,0.829) | 0.99         | 0.00 | (0.986,0.998) | 0.93         | 0.07 | (0.8,0.974)   | 0.91    | 0.06 | (0.775,0.966) |
| 0.90    | 20        | 0.88      | 0.05 | (0.788,0.928) | 0.99         | 0.01 | (0.978,0.998) | 0.93         | 0.05 | (0.829,0.989) | 0.98    | 0.03 | (0.92,0.995)  |

(B)

| CNVfreq | CNVlength | CODEX.CBS |      |               | CODEX2ns.CBS |      |       | CODEX2nr.CBS |      |              | SVD.HMM |      |           |
|---------|-----------|-----------|------|---------------|--------------|------|-------|--------------|------|--------------|---------|------|-----------|
|         |           | median    | sd   | CI            | median       | sd   | CI    | median       | sd   | CI           | median  | sd   | CI        |
| 0.10    | 20        | 1.00      | 0.00 | (1,1)         | 1.00         | 0.00 | (1,1) | 1.00         | 0.00 | (1,1)        | 1.00    | 0.00 | (1,1)     |
| 0.20    | 20        | 1.00      | 0.00 | (1,1)         | 1.00         | 0.00 | (1,1) | 1.00         | 0.00 | (1,1)        | 1.00    | 0.00 | (1,1)     |
| 0.30    | 20        | 1.00      | 0.00 | (1,1)         | 1.00         | 0.00 | (1,1) | 1.00         | 0.00 | (1,1)        | 1.00    | 0.00 | (1,1)     |
| 0.40    | 20        | 1.00      | 0.00 | (1,1)         | 1.00         | 0.00 | (1,1) | 1.00         | 0.00 | (1,1)        | 1.00    | 0.00 | (1,1)     |
| 0.50    | 20        | 1.00      | 0.01 | (0.982,1)     | 1.00         | 0.00 | (1,1) | 0.98         | 0.05 | (0.862,1)    | 1.00    | 0.06 | (0.911,1) |
| 0.60    | 20        | 0.81      | 0.08 | (0.647,0.881) | 1.00         | 0.00 | (1,1) | 0.90         | 0.08 | (0.758,0.99) | 1.00    | 0.02 | (0.957,1) |
| 0.70    | 20        | 0.99      | 0.01 | (0.969,1)     | 1.00         | 0.00 | (1,1) | 0.99         | 0.07 | (0.845,1)    | 1.00    | 0.00 | (0.998,1) |
| 0.80    | 20        | 1.00      | 0.01 | (0.986,1)     | 1.00         | 0.00 | (1,1) | 1.00         | 0.07 | (0.786,1)    | 1.00    | 0.00 | (0.997,1) |
| 0.90    | 20        | 1.00      | 0.00 | (1,1)         | 1.00         | 0.00 | (1,1) | 1.00         | 0.03 | (0.938,1)    | 1.00    | 0.00 | (0.995,1) |

**Table S10.** Recall and precision rates for CNV detection in heterogeneous samples. Recall rates (A) and precision rates (B) from simulations with deletions in heterogeneous samples. Purity,  $p$ , refers to the proportion of cells having the deletion in a heterogeneous sample. For copy number loss, we spike in signals corresponding to copy number  $p \times c + (1 - p) \times 2$ , where  $c$  is sampled from a Gaussian distribution with mean 1. Confidence interval (CI) is computed using the 5th and 95th percentile from 20 simulation runs.

(A)

| purity | CNVfreq | CNVlength | CODEX.CBS |      |               | CODEX2ns.CBS |      |               | CODEX2nr.CBS |      |               | SVD.HMM |      |               |
|--------|---------|-----------|-----------|------|---------------|--------------|------|---------------|--------------|------|---------------|---------|------|---------------|
|        |         |           | median    | sd   | CI            | median       | sd   | CI            | median       | sd   | CI            | median  | sd   | CI            |
| 0.90   | 0.10    | 20        | 1.00      | 0.00 | (1,1)         | 1.00         | 0.00 | (1,1)         | 1.00         | 0.00 | (1,1)         | 0.98    | 0.04 | (0.874,0.994) |
| 0.90   | 0.20    | 20        | 1.00      | 0.00 | (0.997,1)     | 1.00         | 0.00 | (1,1)         | 1.00         | 0.00 | (0.997,1)     | 0.90    | 0.03 | (0.837,0.927) |
| 0.90   | 0.40    | 20        | 1.00      | 0.00 | (0.997,1)     | 1.00         | 0.00 | (0.999,1)     | 1.00         | 0.00 | (0.999,1)     | 0.71    | 0.03 | (0.663,0.744) |
| 0.70   | 0.10    | 20        | 1.00      | 0.01 | (0.988,1)     | 1.00         | 0.01 | (0.988,1)     | 1.00         | 0.01 | (0.988,1)     | 0.82    | 0.08 | (0.722,0.936) |
| 0.70   | 0.20    | 20        | 1.00      | 0.00 | (0.992,1)     | 1.00         | 0.00 | (0.994,1)     | 1.00         | 0.00 | (0.994,1)     | 0.75    | 0.06 | (0.608,0.785) |
| 0.70   | 0.40    | 20        | 0.99      | 0.01 | (0.98,0.999)  | 1.00         | 0.00 | (0.997,1)     | 1.00         | 0.00 | (0.993,1)     | 0.46    | 0.03 | (0.429,0.522) |
| 0.50   | 0.10    | 20        | 0.99      | 0.02 | (0.946,1)     | 0.99         | 0.01 | (0.969,1)     | 0.99         | 0.01 | (0.97,1)      | 0.52    | 0.09 | (0.45,0.698)  |
| 0.50   | 0.20    | 20        | 0.99      | 0.01 | (0.961,0.994) | 1.00         | 0.01 | (0.972,1)     | 0.99         | 0.01 | (0.964,0.997) | 0.40    | 0.04 | (0.327,0.454) |
| 0.50   | 0.40    | 20        | 0.93      | 0.05 | (0.807,0.962) | 0.99         | 0.01 | (0.962,0.996) | 0.95         | 0.06 | (0.814,0.981) | 0.17    | 0.03 | (0.132,0.213) |
| 0.30   | 0.10    | 20        | 0.74      | 0.12 | (0.589,0.971) | 0.85         | 0.10 | (0.704,0.989) | 0.82         | 0.12 | (0.618,0.982) | 0.14    | 0.04 | (0.077,0.19)  |
| 0.30   | 0.20    | 20        | 0.62      | 0.11 | (0.479,0.793) | 0.88         | 0.07 | (0.695,0.919) | 0.68         | 0.09 | (0.546,0.819) | 0.08    | 0.03 | (0.041,0.129) |
| 0.30   | 0.40    | 20        | 0.29      | 0.06 | (0.219,0.402) | 0.88         | 0.04 | (0.804,0.928) | 0.38         | 0.05 | (0.311,0.486) | 0.03    | 0.01 | (0.016,0.042) |
| 0.10   | 0.10    | 20        | 0.00      | 0.00 | (0,0)         | 0.00         | 0.00 | (0,0)         | 0.00         | 0.03 | (0,0.079)     | 0.00    | 0.00 | (0,0)         |
| 0.10   | 0.20    | 20        | 0.00      | 0.00 | (0,0)         | 0.00         | 0.03 | (0,0.061)     | 0.00         | 0.01 | (0,0.036)     | 0.00    | 0.00 | (0,0)         |
| 0.10   | 0.40    | 20        | 0.00      | 0.00 | (0,0)         | 0.01         | 0.02 | (0,0.058)     | 0.00         | 0.00 | (0,0)         | 0.00    | 0.00 | (0,0)         |

(B)

| purity | CNVfreq | CNVlength | CODEX.CBS |      |               | CODEX2ns.CBS |      |           | CODEX2nr.CBS |      |               | SVD.HMM |      |               |
|--------|---------|-----------|-----------|------|---------------|--------------|------|-----------|--------------|------|---------------|---------|------|---------------|
|        |         |           | median    | sd   | CI            | median       | sd   | CI        | median       | sd   | CI            | median  | sd   | CI            |
| 0.90   | 0.10    | 20        | 1.00      | 0.04 | (0.991,1)     | 1.00         | 0.00 | (1,1)     | 1.00         | 0.00 | (1,1)         | 1.00    | 0.01 | (0.984,1)     |
| 0.90   | 0.20    | 20        | 1.00      | 0.02 | (0.995,1)     | 1.00         | 0.01 | (0.997,1) | 1.00         | 0.00 | (1,1)         | 0.92    | 0.02 | (0.868,0.938) |
| 0.90   | 0.40    | 20        | 0.62      | 0.05 | (0.558,0.7)   | 1.00         | 0.00 | (1,1)     | 1.00         | 0.00 | (1,1)         | 0.62    | 0.04 | (0.544,0.647) |
| 0.70   | 0.10    | 20        | 1.00      | 0.00 | (1,1)         | 1.00         | 0.00 | (1,1)     | 1.00         | 0.00 | (1,1)         | 1.00    | 0.01 | (0.984,1)     |
| 0.70   | 0.20    | 20        | 1.00      | 0.02 | (0.953,1)     | 1.00         | 0.01 | (0.997,1) | 1.00         | 0.00 | (1,1)         | 0.98    | 0.01 | (0.961,0.996) |
| 0.70   | 0.40    | 20        | 0.74      | 0.05 | (0.662,0.823) | 1.00         | 0.00 | (1,1)     | 0.92         | 0.03 | (0.874,0.958) | 0.70    | 0.03 | (0.665,0.755) |
| 0.50   | 0.10    | 20        | 1.00      | 0.05 | (0.885,1)     | 1.00         | 0.00 | (1,1)     | 1.00         | 0.03 | (0.994,1)     | 1.00    | 0.01 | (0.978,1)     |
| 0.50   | 0.20    | 20        | 1.00      | 0.02 | (0.944,1)     | 1.00         | 0.00 | (1,1)     | 1.00         | 0.02 | (0.953,1)     | 1.00    | 0.02 | (0.982,1)     |
| 0.50   | 0.40    | 20        | 0.88      | 0.04 | (0.823,0.92)  | 1.00         | 0.01 | (0.999,1) | 0.91         | 0.03 | (0.875,0.956) | 0.75    | 0.04 | (0.705,0.798) |
| 0.30   | 0.10    | 20        | 1.00      | 0.00 | (1,1)         | 1.00         | 0.00 | (1,1)     | 1.00         | 0.00 | (1,1)         | 1.00    | 0.00 | (1,1)         |
| 0.30   | 0.20    | 20        | 1.00      | 0.00 | (1,1)         | 1.00         | 0.01 | (0.997,1) | 1.00         | 0.00 | (1,1)         | 1.00    | 0.00 | (1,1)         |
| 0.30   | 0.40    | 20        | 0.93      | 0.06 | (0.815,1)     | 1.00         | 0.00 | (1,1)     | 0.94         | 0.03 | (0.926,1)     | 0.95    | 0.05 | (0.854,1)     |
| 0.10   | 0.10    | 20        |           |      | (NA,NA)       |              |      | (NA,NA)   | 1.00         | 0.00 | (1,1)         |         |      | (NA,NA)       |
| 0.10   | 0.20    | 20        |           |      | (NA,NA)       | 1.00         | 0.00 | (1,1)     | 1.00         | 0.00 | (1,1)         |         |      | (NA,NA)       |
| 0.10   | 0.40    | 20        |           |      | (NA,NA)       | 1.00         | 0.00 | (1,1)     |              |      | (NA,NA)       |         |      | (NA,NA)       |

**Table S11.** Processing time and memory usage of CODEX2 for 1000 Genome Project Data. Processing time and memory usage of CODEX2 for 1000 Genome Project Data. Different number of exons are randomly selected from the 1000 Genomes Project WES data. CODEX2 is ran in the negative control region mode on a high-performance cluster. Time unit is minute (min); memory usage unit is Megabyte (Mb). Results are averaged from 5 runs.

| # of exons | proc time | memory usage |
|------------|-----------|--------------|
| 2000       | 23.57     | 7.00         |
| 4000       | 39.61     | 11.51        |
| 6000       | 67.28     | 16.01        |
| 8000       | 76.73     | 20.50        |
| 10000      | 109.51    | 24.98        |
